# Supplementary material
Source: Springer Nature journal article supplement (https://www.springermedizin.de/resource/supplementary/13075_2012_3976_MOESM2_ESM.pdf/10110284)

A

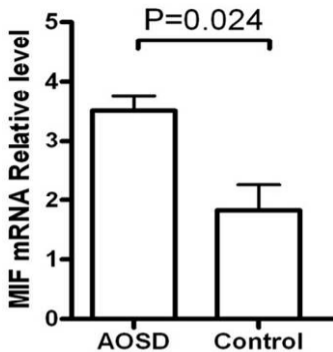

B

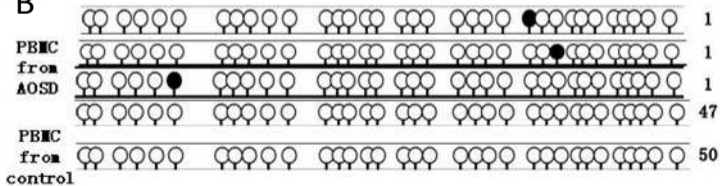

Supplement: MOESM2 [file 10110284]
